# Supplementary material for: Tenascin-C drives persistence of organ fibrosis
Source: PubMed Central journal article supplement (PMC4895803; doi:10.1038/ncomms11703), 2016-06-03
Supplement: ncomms11703-s1.pdf [file ncomms11703-s1.pdf]

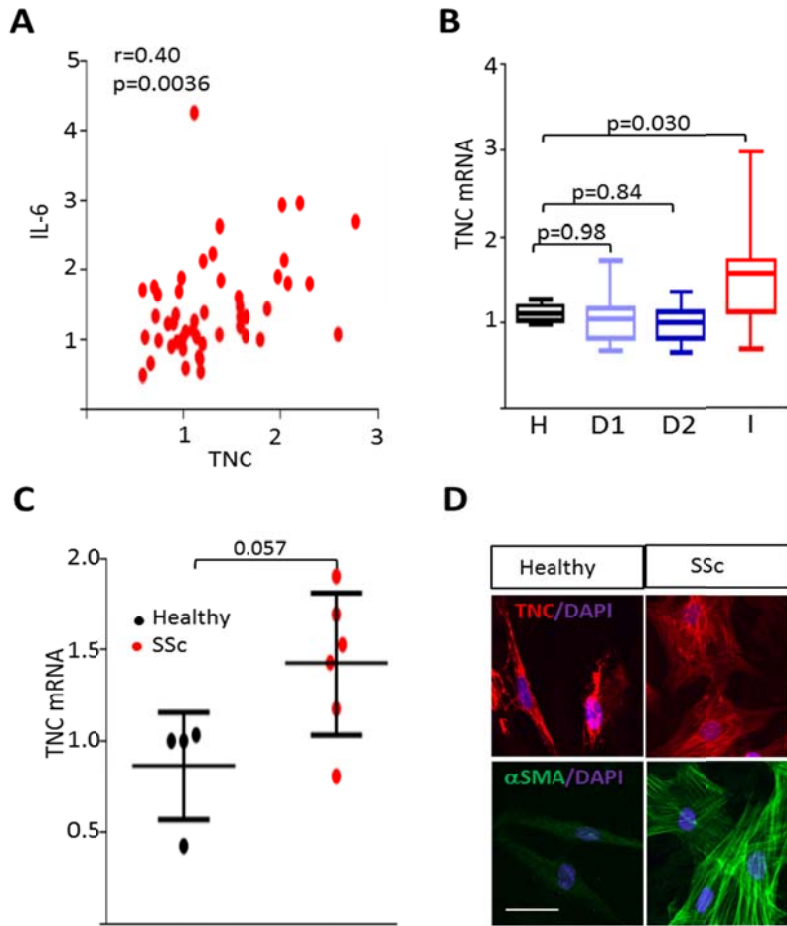

### Supplementary Fig. 1.

#### Elevated tenascin-C in SSc skin biopsies and isolated skin fibroblasts.

**A.** Correlation of tenascin-C and IL-6 mRNA levels in an SSc biopsy-derived transcriptome dataset (GSE32413; see Fig 1 for full description). **B.** Transcriptome dataset from an independent cohort of 17 SSc and 6 healthy control skin biopsies (GSE9285). Tenascin-C mRNA levels in intrinsic subsets (H, healthy controls; D1, diffuse 1; D2, diffuse 2; I, inflammatory) shown as box plots spanning values from 25-75 percentile. Horizontal lines represent median, maximum and minimum values. One-way ANOVA followed by Sidak's multiple comparison test. **C.** RNA from healthy control (n=4) or SSc (n=6) skin fibroblasts was

examined by qPCR. Results are means  $\pm$ S.D. from triplicate determination. Mann-Whitney *U* test. **D.** Immunofluorescence of explanted SSc (n =3) and healthy control (n = 2) skin fibroblasts using antibodies to tenascin-C and  $\alpha$ SMA; nuclei identified using DAPI. Representative confocal images; bar =25  $\mu$ m.

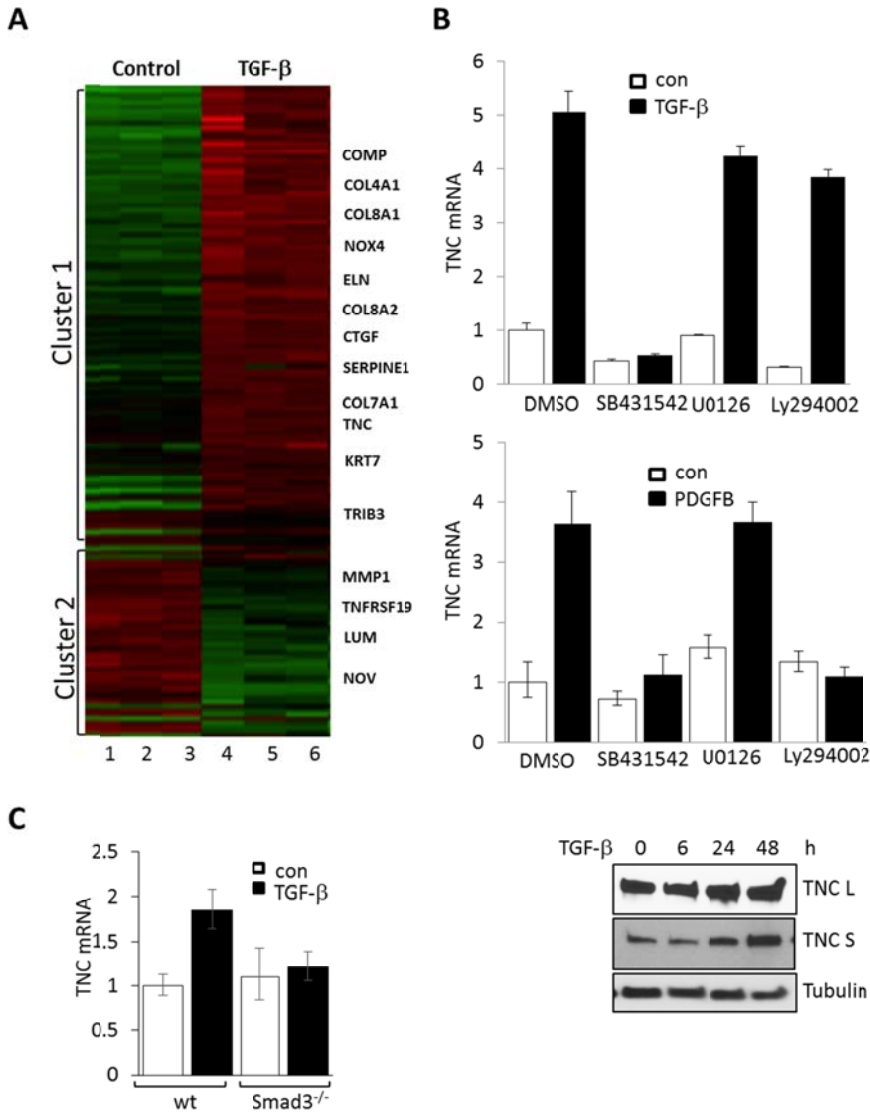

**Supplementary Fig. 2.**

### Regulation of tenascin-C expression in skin fibroblasts

**A.** RNA isolated from healthy adult skin fibroblasts incubated with or without TGF-β1 for 24 h was hybridized to Illumina human HT-12 Microarray Chips. Heatmap showing -fold change in gene expression compared with the average in control samples. Red, up-regulated; green, down-regulated. Lanes 1-3, untreated control fibroblasts; lanes 4-6, TGF-β-treated fibroblasts

(triplicates). FDR 0.05, >1.5-fold change. Clusters indicate genes significantly up- or down-regulated. **B.** Foreskin fibroblasts were incubated with TGF- $\beta$  (10 ng/ml) (upper panel) or PDGFB (25 ng/ml) (lower panel) alone, or in the presence or absence of SB431532 or U0126 or Ly294002. Results of real-time qPCR represent means  $\pm$  S.D. of triplicate determinations from a representative experiment. Closed bars, treated fibroblasts; open bars, untreated fibroblasts. **C.** Confluent cultures of wt and SMAD3<sup>-/-</sup> MEFs were incubated with TGF- $\beta$  (10 ng/ml) for 24h. Results of real-time qPCR represent means  $\pm$  S.D. of triplicate determinations from a representative experiment. Closed bars, treated fibroblasts; open bars, untreated fibroblasts. **D.** Confluent adult skin fibroblasts were incubated with TGF- $\beta$  (10 ng/ml). Whole cell lysates were examined by Western analysis. S, secreted; L, lysates.

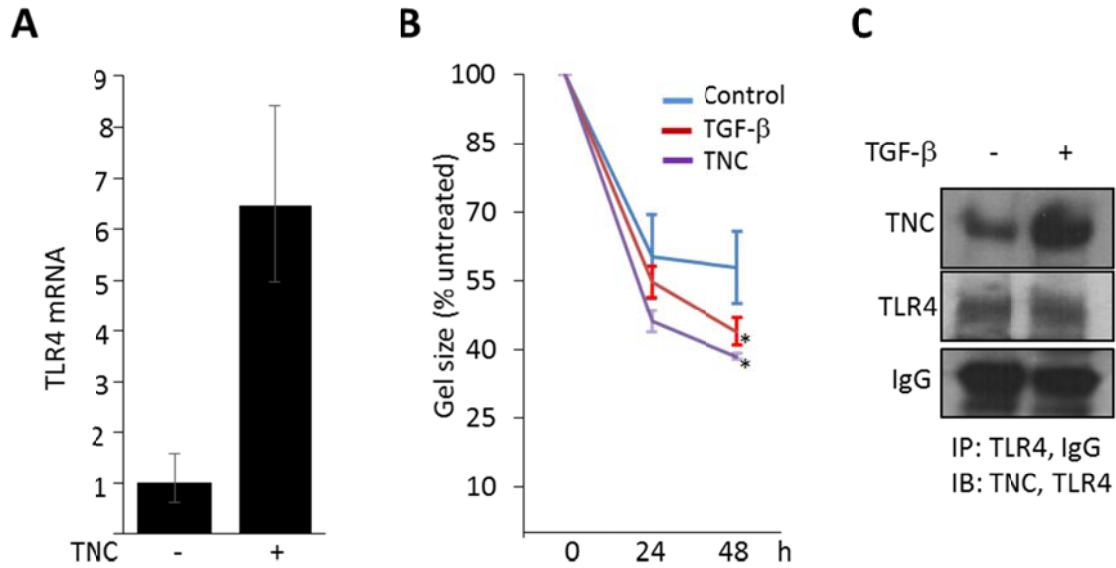

**Supplementary Fig. 3.**

**Tenascin-C enhances fibroblast contractility, induces TLR4 expression and interacts directly with TLR4.**

Confluent foreskin fibroblasts were incubated with tenascin-C (2  $\mu\text{g/ml}$ ) and/or TGF- $\beta$ 1. **A.** Results of qPCR shown as means  $\pm$  SD from triplicate determinations. **B.** Fibroblasts seeded in Type I collagen gels were incubated in media with TGF- $\beta$  in the presence or absence of tenascin-C (2  $\mu\text{g/ml}$ ). At 24 and 48 h, gel diameters were determined. Results, expressed as percentage of gel area compared to controls (time 0) are the mean  $\pm$  S.D. of triplicate determinations from three separate wells. Mann-Whitney *U* test. **C.** Whole-cell lysates were immunoprecipitated with antibodies to TLR4 or IgG, followed by immunoblotting with antibodies to tenascin-C or TLR4. Representative immunoblot.

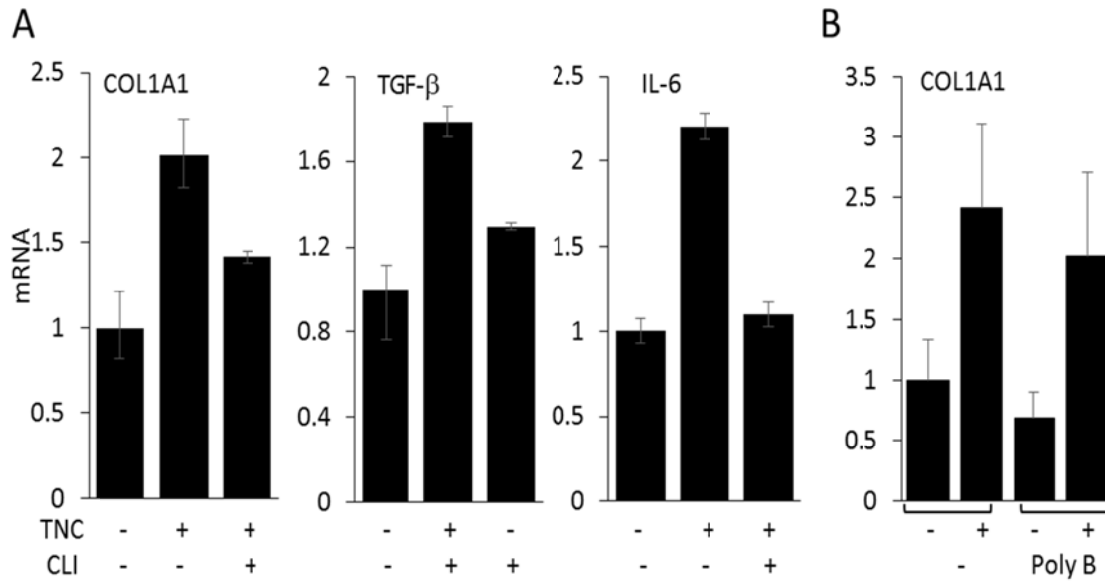

**Supplementary Fig. 4.**

**Tenascin-C-induced fibrotic responses are TLR4-dependent**

Foreskin fibroblasts were incubated in media with tenascin-C (2  $\mu$ g/ml) in the absence or presence of CLI-095 for 72 h (A), or polymyxin B for 24 h (B). qPCR results shown as means  $\pm$  S.D. from triplicate determinations from representative experiments.

**A**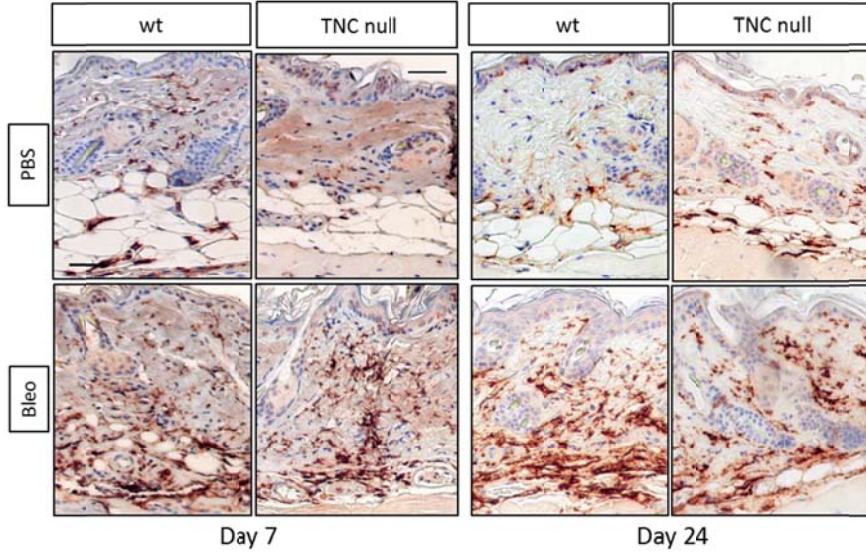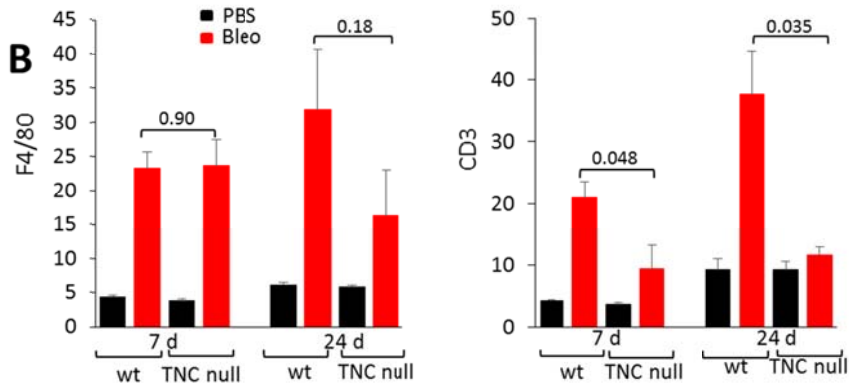**Supplementary Fig. 5.****Bleomycin-induced macrophage and T cell accumulation in skin in wildtype and TNC<sup>-/-</sup> mice.**

Wildtype mice and TNC<sup>-/-</sup> mice received bleomycin or PBS via s.c. injections. Skin was harvested at day 7 and day 24. **A.** Immunohistochemistry using antibodies to F4/80.

Representative photomicrographs. Bars, 50  $\mu$ m. **B.** Positive immunostaining quantified using Image J. Results (percentage of area stained positive for F4/80 or CD3 from three randomly selected areas) are means  $\pm$  S.D. of three mice/group. Student's t-test.

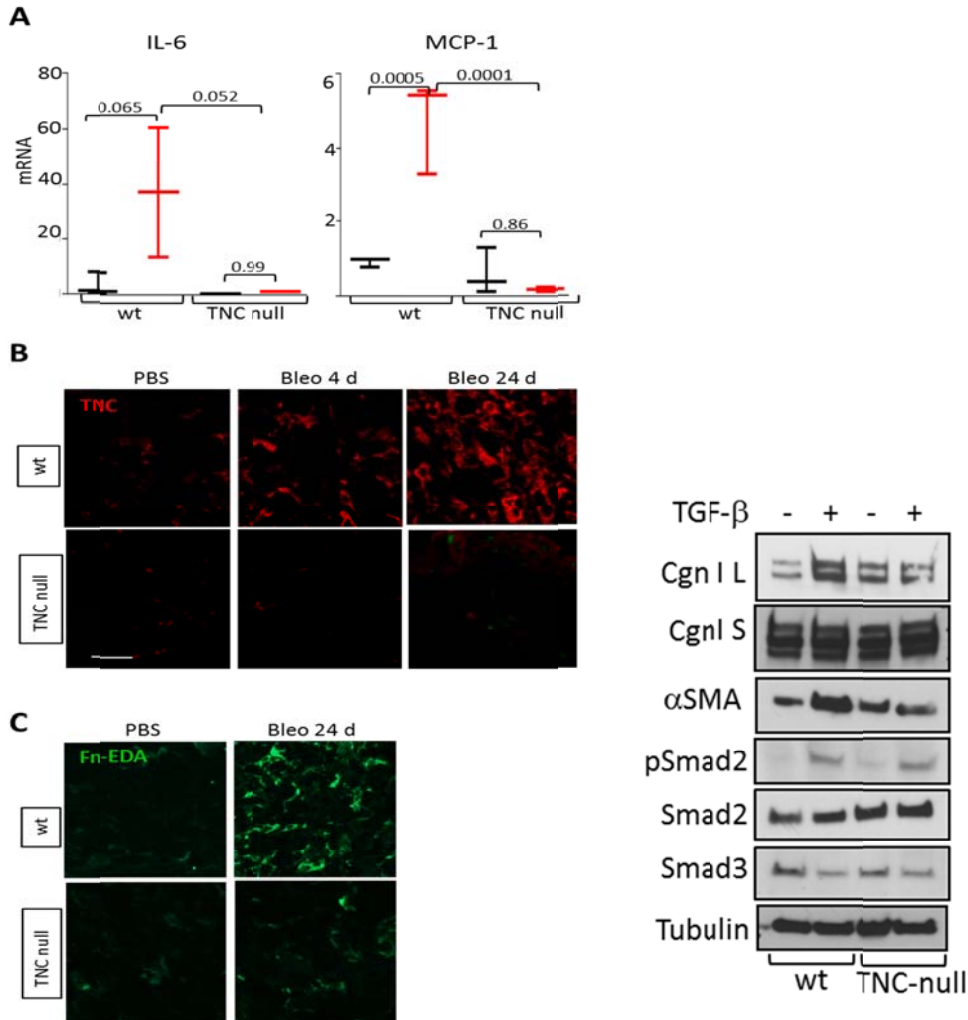

### Supplementary Fig. S6

#### Attenuated cutaneous inflammation and Fn-EDA and tenascin-C deposition in $TNC^{-/-}$ mice.

Wildtype mice and  $TNC^{-/-}$  mice were administered bleomycin or PBS via s.c. injections. Skin was harvested at day 14 (A) or 24 (B). **A**. Results of qPCR, normalized with GAPDH, are means  $\pm$  S.D. of triplicate determinations from three mice/group. **B**, **C**. Immunofluorescence microscopy using antibodies to tenascin-C or Fn-EDA. Representative images; bars = 25  $\mu$ m.



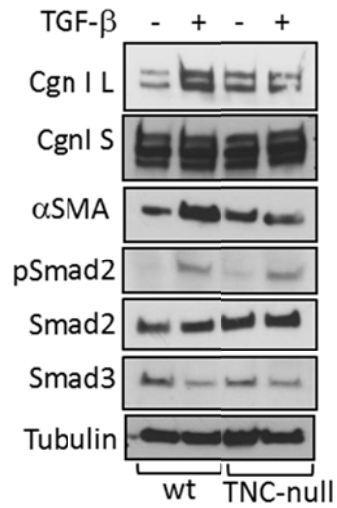

**Supplementary Fig. 7.**

**Impaired TGF-β responses in *TNC*<sup>-/-</sup> skin fibroblasts.**

Confluent skin fibroblasts isolated from wildtype mice and *TNC*<sup>-/-</sup> mice were incubated in parallel with TGF-β for 24 h. Whole cell lysates were examined Western blot analysis.

Representative immunoblot. S, secreted; L, lysates.

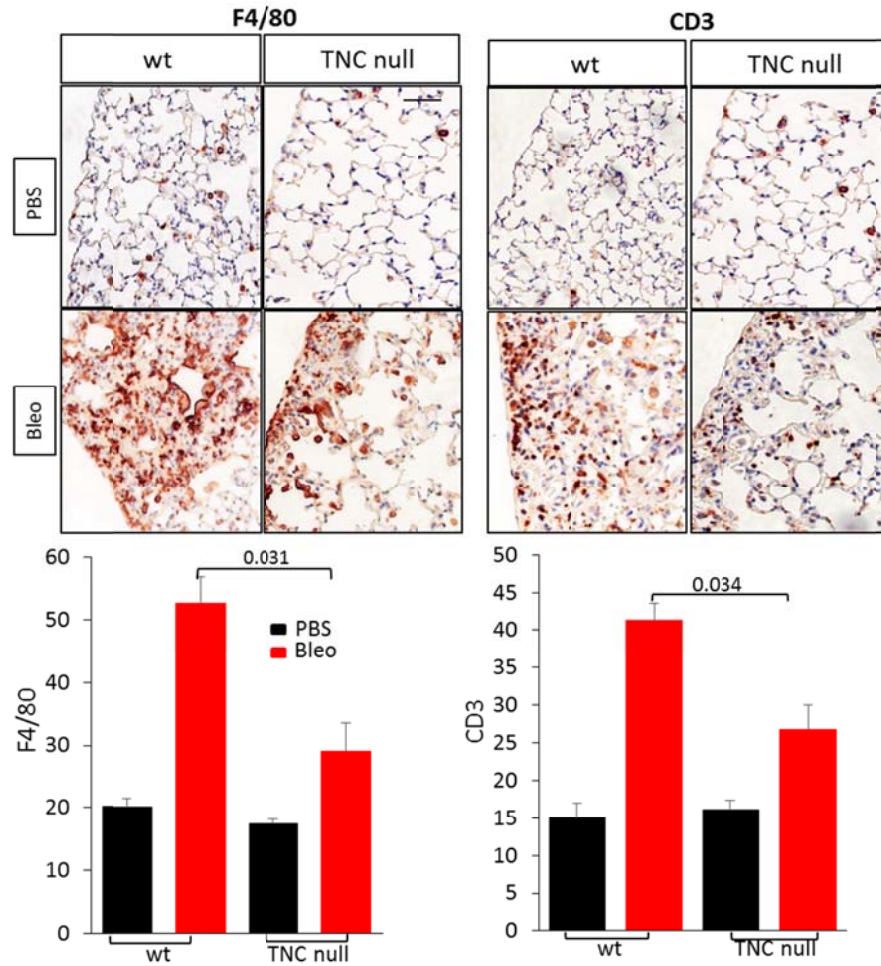

**Supplementary Fig. 8.**

**Bleomycin-induced macrophage accumulation in the lungs in wildtype and TNC<sup>-/-</sup> mice.**

Wildtype mice and TNC<sup>-/-</sup>-null mice were administered bleomycin via s.c. injections, and lungs were harvested at day 24. Upper panels, immunohistochemistry using antibodies to F4/80 or CD3. Representative photomicrographs. Bars, 50  $\mu$ m. Lower panels, positive immunostaining was quantified using Image J; results (percentage of area stained positive for F4/80 or CD3) are means  $\pm$  S.D. of percentage of area stained positive for F4/80 or CD3 from three randomly chosen fields from a single mouse representative of 3 mice. Student's t-test.

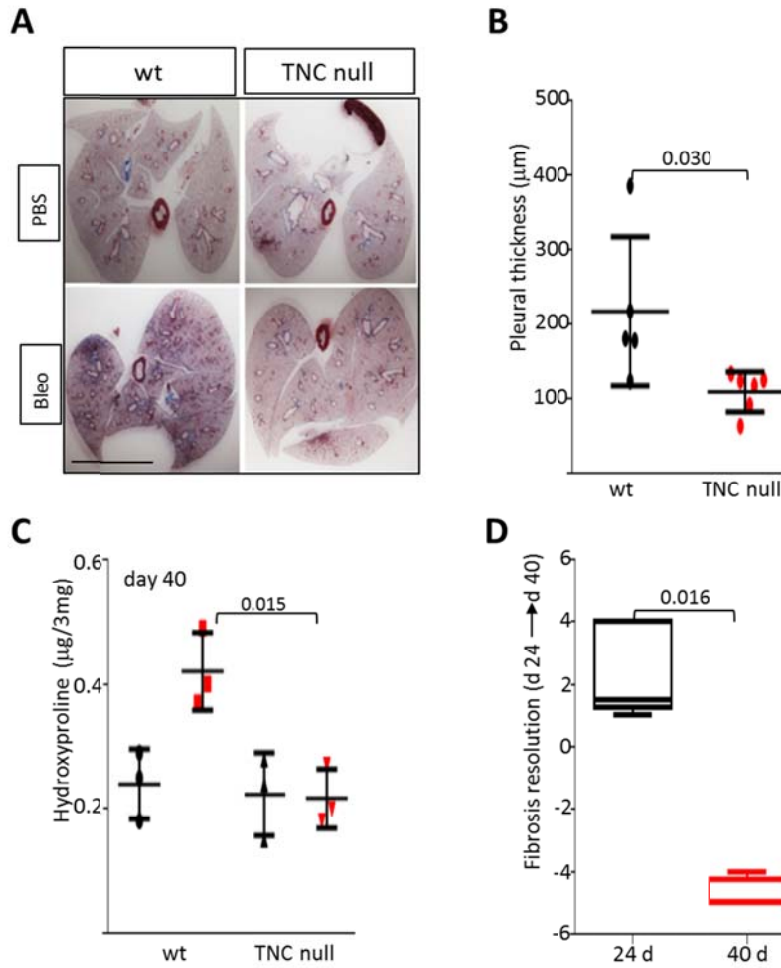

### Supplementary Fig. 9.

#### Attenuated lung fibrosis and accelerated resolution in *TNC*<sup>-/-</sup> mice.

Wildtype mice and *TNC*<sup>-/-</sup> mice were administered bleomycin via s.c. injections, and lungs were harvested at day 24 (A,B) or day 40 (C,D). **A.** Trichrome stain. Representative images. Bars = 0.2 mm. **B.** Pleural thickness. Mann-Whitney *U* test. **C.** Lung collagen content at 40 d determined by hydroxyproline assays. Mann-Whitney *U* test. Results are the means ± SD of triplicate determinations from 3 mice/group. **D.** Fibrosis resolution from day 24 to day 40. Mann-Whitney *U* test.

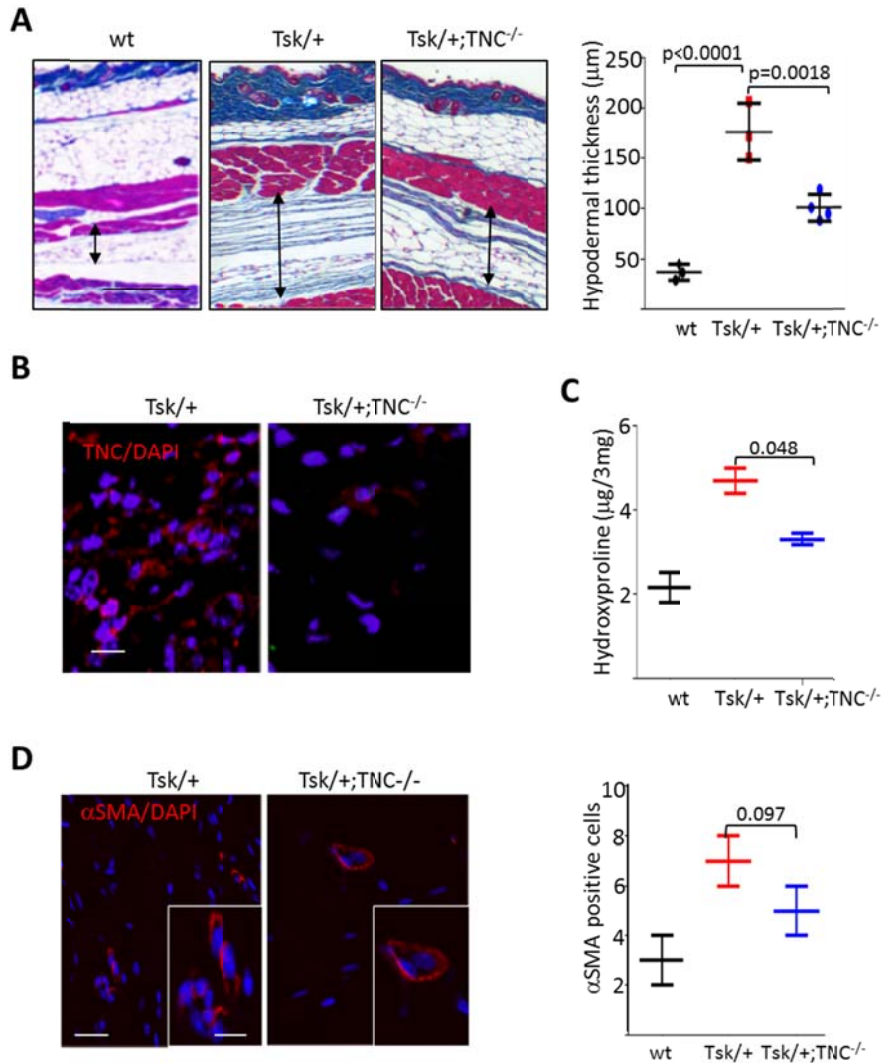

**Supplementary Fig. 10.**

**Attenuated hypodermal fibrosis in TSK/+ mice lacking tenascin-C**

Mice were sacrificed at 12 weeks of age, and skin including hypodermis was harvested. **A.** Trichrome stain. Arrows indicate hypodermis. Bar, 100 µm. Representative images from 2-3 mice/group. Right panel, hypodermal thickness. Results are means ± SD from 5 hpf/mouse. One-way ANOVA followed by Sidak's multiple comparison test. **B, D.** Immunofluorescence microscopy using antibodies to tenascin-C or αSMA; DAPI used to identify nuclei. Bar, 25 µm (B) or 50 µm (D). Student's t-test. **C.** Collagen content determined by hydroxyproline assays.

Results are the means  $\pm$  S.D. from triplicate determinations from 2 mice/group. Right panel, quantitation of  $\alpha$ SMA-immunopositive interstitial cells within the hypodermis. Results are the means  $\pm$  S.D. of three determinations from 3 randomly chosen hpf. Student's t-test.

**A Figure 2 Western Blots**

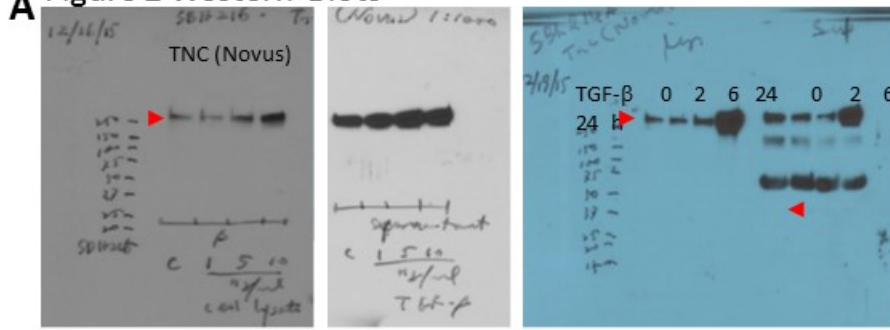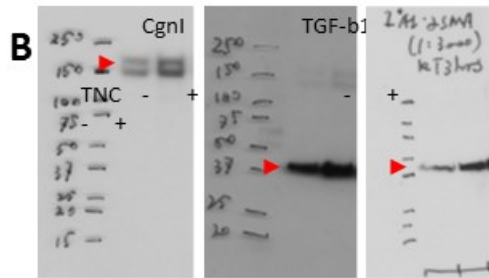

**A Figure 3 Western Blots**

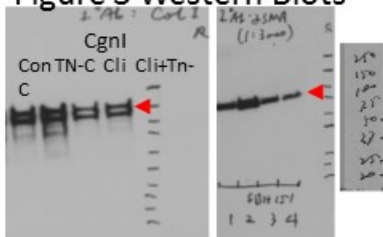

**C**

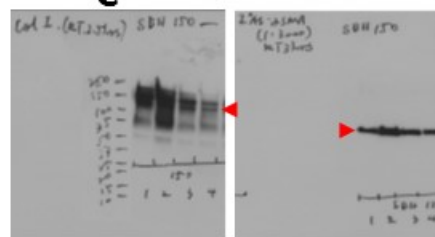

**D**

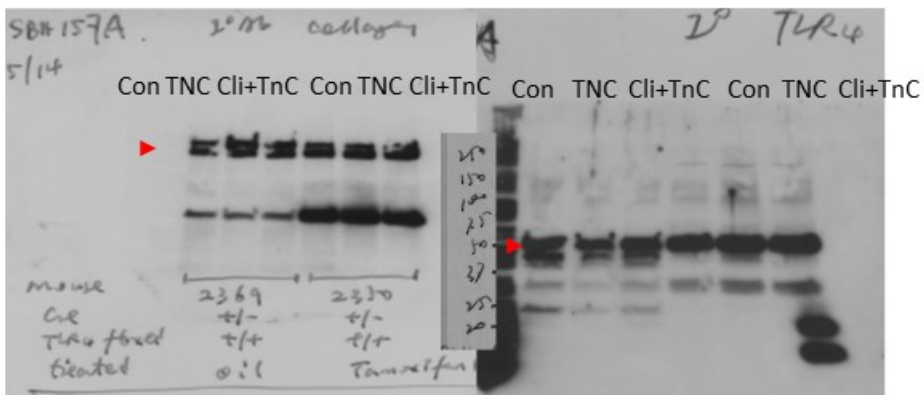

**Supplementary Fig. 11.** The full Western blots of Figs. 2 and 3.

## Supplementary Table 1

### Expression of endogenous TLR4 ligands in skin biopsies

| Endogenous TLR ligand     | Expression in SSc skin | Expression in healthy skin |
|---------------------------|------------------------|----------------------------|
| Fibronectin-EDA           | ++++                   | -                          |
| Tenascin-C                | ++++                   | -                          |
| HA (low molecular weight) | ++                     | -                          |
| Biglycan                  | variable               | -                          |
| GP96                      | -                      | -                          |
| HMGB1                     | -                      | -                          |

Forearm skin biopsies from SSc patients (n=3) and healthy controls (n=3) were examined by immunofluorescence and/or immunohistochemistry. Staining intensity in the dermis for each antibody was scored by two blinded observers as follows: -, undetectable in the interstitial space; +, weak expression; ++, strong expression; +++, very strong expression.

**Supplementary Table 2 (Cohort 4)**

| Subject code | Age | Gender | Subtype | MRSS | scl-70 | RNA Th/To | RNA U11. |
|--------------|-----|--------|---------|------|--------|-----------|----------|
| 874          | 46  | F      | lcSSc   | 13   | 1      | NA        | NA       |
| 975          | 27  | F      | dcSSc   | 14   | 1      | NA        | NA       |
| 1007         | 25  | F      | lcSSc   | 10   | 1      | NA        | NA       |
| 1194         | 54  | F      | lcSSc   | 2    | 0      | 1         | NA       |
| 1219         | 36  | F      | lcSSc   | 3    | 0      | 1         | NA       |
| 1556         | 27  | F      | lcSSc   | 0    | 1      | 0         | NA       |
| 1602         | 32  | F      | dcSSc   | 13   | 1      | 0         | NA       |
| 1661         | 31  | F      | lcSSc   | 4    | 1      | 0         | NA       |
| 1857         | 20  | F      | dcSSc   | 12   | 1      | 0         | NA       |
| 1939         | 18  | F      | lcSSc   | 3    | 1      | NA        | NA       |
| 2039         | 42  | F      | lcSSc   | 17   | 1      | NA        | NA       |
| 2136         | 46  | F      | lcSSc   | 0    | 0      | 1         | NA       |
| 2221         | 27  | F      | dcSSc   | 14   | 1      | 0         | NA       |
| 2244         | 28  | F      | lcSSc   | 10   | 1      | NA        | NA       |
| 2259         | 20  | F      | lcSSc   | 3    | 1      | NA        | NA       |
| 2302         | 42  | F      | dcSSc   | 2    | 0      | 1         | NA       |
| 2448         | 41  | F      | lcSSc   | 6    | 0      | 1         | NA       |
| 2457         | 36  | F      | lcSSc   | 13   | 1      | NA        | NA       |
| 2620         | 37  | F      | lcSSc   | 7    | 0      | NA        | 1        |
| 2635         | 42  | F      | lcSSc   | 32   | 1      | NA        | NA       |
| 2725         | 43  | F      | lcSSc   | 17   | 1      | NA        | NA       |
| 2748         | 23  | F      | lcSSc   | 10   | 1      | NA        | NA       |
| 2749         | 28  | F      | dcSSc   | 2    | 0      | 1         | NA       |
| 2776         | 33  | F      | lcSSc   | 18   | 1      | NA        | NA       |
| 2781         | 43  | F      | lcSSc   | 17   | 1      | NA        | NA       |
| 2819         | 44  | F      | dcSSc   | 27   | 1      | NA        | NA       |
| 2821         | 46  | F      | dcSSc   | 4    | 0      | 1         | NA       |
| 2834         | 36  | F      | lcSSc   | 8    | 1      | NA        | NA       |
| 2919         | 49  | F      | lcSSc   | 21   | 1      | NA        | NA       |
| 2962         | 22  | F      | dcSSc   | 6    | 1      | NA        | NA       |
| 3049         | 45  | F      | dcSSc   | 5    | 0      | NA        | 1        |
| 3098         | 36  | F      | dcSSc   | 2    | 1      | NA        | NA       |
| 3137         | 42  | F      | lcSSc   | 27   | 1      | NA        | NA       |
| 3211         | 54  | F      | lcSSc   | 27   | 1      | NA        | NA       |
| 3224         | 30  | F      | dcSSc   | 4    | 0      | 1         | NA       |
| 3339         | 41  | F      | lcSSc   | 7    | 1      | NA        | NA       |
| 3340         | 30  | F      | lcSSc   | 2    | 1      | NA        | NA       |



|      |    |   |       |    |   |    |    |
|------|----|---|-------|----|---|----|----|
| 3354 | 17 | F | dcSSc | 20 | 1 | NA | NA |
| 3428 | 35 | F | lcSSc | 6  | 1 | NA | NA |
| 3433 | 45 | F | lcSSc | 4  | 0 | 1  | NA |
| 3486 | 30 | F | dcSSc | 43 | 1 | NA | NA |
| 3487 | 35 | F | lcSSc | 6  | 1 | NA | NA |
| 3633 | 37 | F | lcSSc | 6  | 1 | NA | NA |
| 3645 | 29 | F | lcSSc | 10 | 1 | NA | NA |
| 3663 | 28 | F | lcSSc | 6  | 1 | NA | NA |
| 3665 | 50 | F | lcSSc | 4  | 1 | NA | NA |
| 3835 | 26 | F | dcSSc | 1  | 0 | 1  | NA |
| 3843 | 25 | F | dcSSc | 14 | 1 | NA | NA |
| 3880 | 46 | F | lcSSc | 1  | 1 | NA | NA |
| 3919 | 36 | F | lcSSc | 0  | 0 | 1  | NA |
| 3920 | 50 | F | lcSSc | 4  | 1 | 0  | NA |
| 3942 | 56 | F | dcSSc | 9  | 1 | NA | NA |
| 3954 | 51 | F | lcSSc | 3  | 0 | 1  | NA |
| 3981 | 48 | F | lcSSc | 8  | 0 | 1  | NA |
| 4054 | 48 | F | dcSSc | 14 | 1 | NA | NA |
| 4175 | 35 | F | dcSSc | 10 | 1 | NA | NA |
| 4189 | 31 | F | lcSSc | 1  | 0 | 0  | 1  |
| 4198 | 48 | F | dcSSc | 20 | 1 | NA | NA |
| 4224 | 44 | F | dcSSc | 39 | 0 | 0  | 1  |
| 4226 | 37 | F | dcSSc | 24 | 0 | NA | 1  |
| 4378 | 51 | F | lcSSc | 7  | 1 | NA | NA |

Subjects providing serum for tenascin-C determination (validation Cohort) (all female). dcSSc, diffuse cutaneous SSc; lcSSc, limited cutaneous SSc; M, male, F, female. MRSS, modified Rodnan skin score (1-51). 0 represents antibody not present, 1 represents antibody present, NA, not available. Controls were healthy subjects (90% female; median age, 38 years; range, 18 to 54 years).

**Supplementary Table 3 (Cohort 5)**

| Subject Code | Age | Gender | Subtype | MRSS | Positive ANA | scl-70 | ACA | RNA pol III |
|--------------|-----|--------|---------|------|--------------|--------|-----|-------------|
| GC-01-SN     | NA  | M      | dcSSc   | 19   | 1            | 0      | NA  | NA          |
| GC-02-SN     | NA  | F      | dcSSc   | 31   | 1            | 0      | NA  | NA          |
| GC-04-SN     | NA  | F      | dcSSc   | 26   | 1            | 0      | NA  | NA          |
| GC-05-SN     | NA  | M      | dcSSc   | 39   | 1            | 0      | NA  | NA          |
| GC-08-SN     | NA  | F      | dcSSc   | 23   | 1            | 0      | NA  | NA          |
| GC-09-SN     | NA  | M      | dcSSc   | 39   | 1            | 1      | NA  | NA          |
| SR1002       | 34  | F      | dcSSc   | 32   | 1            | 1      | 0   | NA          |
| SR1010       | 60  | F      | dcSSc   | 30   | 1            | 0      | 0   | 1           |
| SR1024       | 56  | F      | dcSSc   | 31   | 1            | 0      | 0   | 0           |
| SR1038       | 63  | F      | dcSSc   | 32   | 1            | 0      | 0   |             |
| SR1042       | 48  | F      | dcSSc   | 8    | 1            | 1      | 0   | 0           |
| SR1067       | 58  | F      | dcSSc   | 12   | 1            | 0      | 0   | 0           |
| SR1080       | 56  | F      | dcSSc   | 22   | 1            | 0      | 0   | 1           |
| SR1094       | 54  | F      | dcSSc   | 15   | 1            | 0      | 1   |             |
| SR1107       | 50  | M      | dcSSc   | 4    | 1            | 0      | 0   | 0           |
| SR1121       | 47  | F      | dcSSc   | 26   | 1            | 0      | 0   | 1           |
| SR1157       | 52  | F      | dcSSc   | 18   | 1            | 0      | 0   | 0           |
| SR1209       | 54  | F      | dcSSc   | 32   | 1            | 0      | 0   | 1           |
| SR1213       | 30  | F      | lcSSc   | 10   | 1            | 1      | 0   | 0           |
| SR1241       | 55  | M      | dcSSc   | 19   | 1            | 0      | 0   | 1           |
| SR1366       | 55  | F      | dcSSc   | 23   | 1            | 0      | 0   | 2           |
| SR1381       | 69  | F      | dcSSc   | 12   | 1            | 1      | 0   | 0           |
| SR1393       | 41  | F      | dcSSc   | 14   | 1            | 0      | 0   | 0           |
| SR1420       | 49  | F      | dcSSc   | 28   | 1            | 0      | 0   | 1           |
| SR1430       | 44  | F      | dcSSc   | 4    | 0            | 0      | 0   | 0           |
| S-Y0-164     | NA  | F      | dcSSc   | 3    | 1            | 1      | NA  | NA          |
| S-Y0-187     | NA  | M      | dcSSc   | 15   | 1            | 0      | NA  | NA          |
| S-Y0-208     | NA  | M      | dcSSc   | 20   | 1            | 1      | NA  | NA          |
| S-Y0-220     | NA  | F      | dcSSc   |      | 1            | 1      | NA  | NA          |
| S-Y0-235     | NA  | F      | dcSSc   | 16   | 1            | 1      | NA  | NA          |

|          |    |   |       |    |   |    |    |    |
|----------|----|---|-------|----|---|----|----|----|
| S-Y0-257 | NA | F | dcSSc | 22 | 1 | NA | NA | NA |
| S-Y0-261 | NA | F | dcSSc | 33 | 1 | 0  | NA | NA |
| S-Y1-088 | NA | F | dcSSc | 37 | 1 | 0  | NA | NA |
| S-Y1-176 | NA | F | dcSSc | 11 | 1 | 1  | NA | NA |
| S-Y1-179 | NA | M | dcSSc | 28 | 1 | 0  | NA | NA |
| S-Y1-183 | NA | F | dcSSc | 40 | 1 | NA | NA | NA |
| S-Y1-25  | NA | M | dcSSc | 26 | 1 | NA | NA | NA |
| S-Y1-79  |    | F | dcSSc | 32 |   | NA | NA | NA |

Subjects providing serum for tenascin-C determination (validation Cohort). dcSSc, diffuse cutaneous SSc; lcSSc, limited cutaneous SSc; M, male, F, female. MRSS, modified Rodnan skin score (1-51). 0 represents antibody not present, 1 represents antibody present, NA, not available. Controls were healthy subjects (90% female; median age, 38 years; range, 18 to 54 years).

## Supplementary Table 4A.

### Top 30 genes up-regulated by TGF- $\beta$ in normal fibroblasts

| Gene name   | Abbreviation                                                                                         | Fold-induction | p value         |          |
|-------------|------------------------------------------------------------------------------------------------------|----------------|-----------------|----------|
| ASNS        | asparagine synthetase (glutamine-hydrolyzing)                                                        | 2.99           | 1.07E-13        |          |
| PSAT1       | phosphoserine aminotransferase 1                                                                     | 2.69           | 1.05E-11        |          |
| COMP        | cartilage oligomeric matrix protein                                                                  | 16.3           | 2.32E-11        |          |
| INHBE       | inhibin, beta E                                                                                      | 4.94           | 3.32E-11        |          |
| LTBP2       | latent transforming growth factor beta binding protein 2                                             | 3.03           | 3.86E-11        |          |
| CNN1        | calponin 1, basic, smooth muscle                                                                     | 3.43           | 5.79E-11        |          |
| HSD17B6     | hydroxysteroid (17-beta) dehydrogenase 6 homolog (mouse)                                             | 2.78           | 1.20E-10        |          |
| BHLHE40     | basic helix-loop-helix family, member e40                                                            | 3.53           | 2.74E-10        |          |
| ACTG2       | actin, gamma 2, smooth muscle, enteric                                                               | 2.54           | 6.89E-10        |          |
| KCNMB1      | potassium large conductance calcium-activated channel, subfamily M, beta member 1                    | 2.59           | 7.48E-10        |          |
| KRT7        | keratin 7                                                                                            | 3.87           | 9.31E-10        |          |
| MGP         | matrix Gla protein                                                                                   | 3.3            | 3.68E-09        |          |
| TPM1        | tropomyosin 1 (alpha)                                                                                | 2.48           | 6.08E-09        |          |
| ITGA11      | integrin, alpha 11                                                                                   | 2.96           | 1.17E-08        |          |
| CDH2        | cadherin 2, type 1, N-cadherin (neuronal)                                                            | 2.39           | 2.46E-08        |          |
| MTHFD2      | methylenetetrahydrofolate dehydrogenase (NADP+ dependent) 2, methenyltetrahydrofolate cyclohydrolase | 2.62           | 2.74E-08        |          |
| NOX4        | NADPH oxidase 4                                                                                      | 3.9            | 2.91E-08        |          |
| PI16        | peptidase inhibitor 16                                                                               | 4.51           | 3.01E-08        |          |
| TRIB3       | tribbles homolog 3 (Drosophila)                                                                      | 3.69           | 4.56E-08        |          |
| NUAK1       | NUAK family, SNF1-like kinase, 1                                                                     | 2.63           | 4.82E-08        |          |
| CTPS        | CTP synthase                                                                                         | 2.41           | 9.39E-08        |          |
| <b>TN-C</b> | <b>tenascin-C</b>                                                                                    | <b>2.59</b>    | <b>9.70E-08</b> |          |
| ALDH1B1     | aldehyde dehydrogenase 1 family, member B1                                                           | 2.49           | 1.68E-07        |          |
| SERPINE1    | serpin peptidase inhibitor, clade E (nexin, plasminogen activator inhibitor type 1), member 1        | 2.52           | 2.23E-07        |          |
| SLC7A5      | solute carrier family 7 (cationic amino acid transporter, y+ system), member 5                       | 2.82           | 3.17E-07        |          |
| ELN         | elastin                                                                                              | 3.98           | 1.03E-06        |          |
| WFDC1       | WAP four-disulfide core domain 1                                                                     | 2.5            | 1.29E-05        |          |
| SLC2A5      | solute carrier family 2 (facilitated glucose/fructose transporter), member 5                         | 2.65           | 0.000026        |          |
| PMEPA1      | prostate transmembrane protein, androgen induced 1                                                   | 2.54           | 3.66E-05        |          |
| KANK4       | KN motif and ankyrin repeat domains 4                                                                | COMP           | 3.03            | 0.000122 |
| ACTC1       | actin, alpha, cardiac muscle 1                                                                       | 2.7            | 0.000277        |          |

**Supplementary Table 4B.****Top 30 genes down-regulated by TGF- $\beta$  in normal fibroblasts**

| Gene name | Abbreviation                                                                    | Fold-induction | p value  |
|-----------|---------------------------------------------------------------------------------|----------------|----------|
| APCDD1    | adenomatosis polyposis coli down-regulated 1                                    | -3.43          | 1.80E-11 |
| SLC7A14   | solute carrier family 7 (cationic amino acid transporter, y+ system), member 14 | -2.58          | 3.13E-11 |
| NOV       | nephroblastoma overexpressed gene                                               | -4.36          | 5.07E-11 |
| ADH1A     | alcohol dehydrogenase 1A (class I), alpha polypeptide                           | -2.04          | 2.04E-10 |
| RAB38     | RAB38, member RAS oncogene family                                               | -2.16          | 2.88E-10 |
| MMP1      | matrix metalloproteinase 1 (interstitial collagenase)                           | -3.06          | 5.96E-10 |
| TYMS      | thymidylate synthetase                                                          | -2.12          | 1.13E-09 |
| NPTX1     | neuronal pentraxin I                                                            | -5.97          | 2.16E-09 |
| GPM6B     | glycoprotein M6B                                                                | -2.28          | 2.20E-09 |
| PDGFRL    | platelet-derived growth factor receptor-like                                    | -2.29          | 2.55E-09 |
| PCOLCE2   | procollagen C-endopeptidase enhancer 2                                          | -2.61          | 3.28E-09 |
| CLEC3B    | C-type lectin domain family 3, member B                                         | -3.51          | 5.84E-09 |
| HSD17B2   | hydroxysteroid (17-beta) dehydrogenase 2                                        | -2.4           | 1.17E-08 |
| TNFRSF19  | tumor necrosis factor receptor superfamily, member 19                           | -2.02          | 2.18E-08 |
| COLEC12   | collectin sub-family member 12                                                  | -2.27          | 2.56E-08 |
| ANGPTL4   | angiopoietin-like 4                                                             | -2.03          | 4.72E-08 |
| PDGFD     | platelet derived growth factor D                                                | -2.46          | 6.75E-08 |
| OLFML2A   | olfactomedin-like 2A                                                            | -2             | 3.17E-07 |
| OLFML1    | olfactomedin-like 1                                                             | -2.09          | 6.53E-07 |
| OAF       | OAF homolog (Drosophila)                                                        | -2.17          | 7.93E-07 |
| BMP4      | bone morphogenetic protein 4                                                    | -2.12          | 9.29E-07 |
| SNHG7     | small nucleolar RNA host gene 7 (non-protein coding)                            | -2.01          | 1.23E-06 |
| CLDN11    | claudin 11                                                                      | -2.79          | 1.25E-06 |
| NFIA      | nuclear factor I/A                                                              | -2.01          | 2.41E-06 |
| RSPO3     | R-spondin 3 homolog (Xenopus laevis)                                            | -2             | 2.84E-06 |
| TGFBR3    | transforming growth factor, beta receptor III                                   | -2.18          | 3.99E-06 |
| CCRL1     | chemokine (C-C motif) receptor-like 1                                           | -2.32          | 4.46E-06 |
| NTN4      | netrin 4                                                                        | -2.06          | 3.43E-05 |
| APOD      | apolipoprotein D                                                                | -2.26          | 3.98E-05 |
| RGS2      | regulator of G-protein signaling 2, 24kDa                                       | -2.19          | 1.07E-04 |
| LUM       | Lumican                                                                         | -2.3           | 3.51E-03 |

Dermal fibroblasts were incubated with TGF- $\beta$  for 24 h, and RNA was isolated and hybridized to Illumina human HT-12 v4 Expression Microarray Chips. The -fold change of gene expression compared with the average in control samples are shown.

## Supplementary Table 5

### Modulation of lung mechanics by bleomycin

Lung mechanics were evaluated on day 24 in wildtype and  $TNC^{-/-}$  mice injected with s.c. PBS or bleomycin. Results represent means  $\pm$  s.d. from at least eight mice/group E, dynamic elastance; C, dynamic compliance; R, dynamic resistance; Rn, Newtonian resistance; G, tissue damping; H, tissue elastance; eta, tissue hysteresivity; Area, area enclosed by pressure volume loop. \* $p < 0.05$ .

|                               | Wildtype mice PBS | Wildtype mice Bleo | $TNC^{-/-}$ mice PBS | $TNC^{-/-}$ mice Bleo | p       |
|-------------------------------|-------------------|--------------------|----------------------|-----------------------|---------|
| C<br>cmH <sub>2</sub> O/mL    | 0.024 $\pm$ 0.001 | 0.016 $\pm$ 0.004  | 0.024 $\pm$ 0.003    | 0.021 $\pm$ 0.002     | 0.0059* |
| E<br>cmH <sub>2</sub> O.s/mL  | 41.41 $\pm$ 1.76  | 71.35 $\pm$ 41.98  | 41.58 $\pm$ 6.08     | 47.19 $\pm$ 5.77      | 0.072   |
| R<br>cmH <sub>2</sub> O.s/mL  | 0.90 $\pm$ 0.05   | 1.25 $\pm$ 0.67    | 0.94 $\pm$ 0.16      | 0.98 $\pm$ 0.12       | 0.30    |
| Rn<br>cmH <sub>2</sub> O.s/mL | 0.34 $\pm$ 0.14   | 0.35 $\pm$ 0.17    | 0.34 $\pm$ 0.15      | 0.35 $\pm$ 0.13       | 0.99    |
| G<br>cmH <sub>2</sub> O/mL    | 7.76 $\pm$ 0.57   | 11.94 $\pm$ 7.21   | 8.07 $\pm$ 1.07      | 8.45 $\pm$ 1.03       | 0.16    |
| H<br>cmH <sub>2</sub> O/mL    | 44.46 $\pm$ 3.15  | 74.65 $\pm$ 42.03  | 41.79 $\pm$ 6.46     | 46.35 $\pm$ 5.93      | 0.028*  |
| Eta                           | 0.17 $\pm$ 0.017  | 0.16 $\pm$ 0.023   | 0.190 $\pm$ 0.02     | 0.18 $\pm$ 0.01       | 0.031*  |
| Area<br>cmH <sub>2</sub> O.mL | 2.55 $\pm$ 1.39   | 4.19 $\pm$ 1.56    | 2.71 $\pm$ 1.03      | 2.62 $\pm$ 0.94       | 0.023*  |

## Supplementary Table 6

### Primer sequences used for qPCR analysis

| <b>Human:</b> |         |                                |
|---------------|---------|--------------------------------|
| hCOL1A1       | Forward | 5'-TGGTGTGCAAGGTCCC-3'         |
|               | Reverse | 5'-CATTCCCTGAAGGCCAG-3'        |
| hCOL1A2       | Forward | 5'-CGGACGACCTGGTGAGAGA-3'      |
|               | Reverse | 5'-CATTGTGTCCCCTAATGCCTT-3'    |
| h-SMA         | Forward | 5'-CAGGGCTGTTTTCCCATCCAT-3'    |
|               | Reverse | 5'-GCCATGTTCTATCGGGTACTTC-3'   |
| hIL6          | Forward | 5'-AAATTCGGTACATCCTCGACGG-3'   |
|               | Reverse | 5'-GGAAGGTTTCAGGTTGTTTTCTGC-3' |
| hTNC1         | Forward | 5'-ACCGCTACCGCCTCAATTAC-3'     |
|               | Reverse | 5'-GGTCCGTCCACAGTTACCA-3'      |
| hTNC1         | Forward | 5'-ACCGCTACCGCCTCAATTAC-3'     |
|               | Reverse | 5'-GGTCCGTCCACAGTTACCA-3'      |
| hTNC2         | Forward | 5'-ACTGTGGACGGAACCAAGAC-3'     |
|               | Reverse | 5'-TGTGGTGAATGACCCTGAGA3'-3'   |
| hGAPDH        | Forward | 5'-CATGAGAAGTATGACAACAGCCT-3'  |
|               | Reverse | 5'-AGTCCTTCCACGATACCAAAGT-3'   |
| <b>Mouse:</b> |         |                                |
| mCOL1A1       | Forward | 5'-AGCCGCAAAGAGTCTACATG-3'     |
|               | Reverse | 5'-CTTAGGCCATTGTGTATGCAG-3'    |
| mCOL1A2       | Forward | 5'-CCGTGCTTCTCAGAACATCA-3'     |
|               | Reverse | 5'-CTTGCCCCATTCATTTGTCT-3'     |



|                 |         |                              |
|-----------------|---------|------------------------------|
| m $\alpha$ SMA  | Forward | 5'-ATGCAGAAGGAGATCACAGC-3'   |
|                 | Reverse | 5'-GTATTCCTGTTTGCTGATCCAC-3' |
| mFn-EDA         | Forward | 5'-AGTCAGTGTGGTTGCCTTG-3'    |
|                 | Reverse | 5'-CTGAACACTGGGTGCTATCC-3'   |
| mTGF- $\beta$ 1 | Forward | 5'-TACAGCAAGGTCCTTGCCCT-3'   |
|                 | Reverse | 5'-GCAGCACGGTGACGCC-3'       |
| mIL-6           | Forward | 5'-GTACTCCAGAAGACCAGAGG-3'   |
|                 | Reverse | 5'-TGCTGGTGACAACCACGGCC-3'   |
| mGAPDH          | Forward | 5'-ATCTTCTTGTGCAGTGCCAGC-3'  |
|                 | Reverse | 5'-GTTGATGGCAACAATCTCCAC-3'  |
